# Supplementary material for: Implementing a prenatal health screening intervention for future fathers in Montreuil, France: most users are immigrants facing hardship
Source: PubMed Central journal article supplement — BMC Public Health. 2024 Oct 28;24:2982. doi: 10.1186/s12889-024-20388-x (PMC11520488; doi:10.1186/s12889-024-20388-x), 2024-10-28
Supplement: 12889_2024_20388_MOESM1_ESM.pdf [file 12889_2024_20388_MOESM1_ESM.pdf]

## MATERNAL QUESTIONNAIRE

Information note given Yes  / No  .....  
Non opposition recorded Yes  / No  .....  
Fluency in French Fluent / Yes / No

Please indicate the language in which you can communicate with the patient:  
.....

For a translator, call Inter Service Migrants 01 53 26 52 62 code 1369

Last name: ..... First name: ..... Date of birth: ...../...../.....  
Directly registered in Orbis at the time of administrative registration.

*Minors are not sent to the interviewer.*

« Is a second parent involved in the pregnancy » Yes  / No

*Exclusion if the answer is no: the questionnaire stops here*

If so: A Man  / A Woman

*If the co-parent is a woman, we leave the framework of the research, we no longer ask questions, but offer consultation*

If it's a man involved:

Last name: ..... First name : ..... Date of birth: ...../...../.....  
(« if you know it »)

E-MAIL: ..... TELEPHONE NUMBER:

"Do you live together?" Yes  / No  / More or less  (More or less opens a free text box)

.....  
.....

If no: "Does he live in Ile de France region ?" Yes  / No  (Free text: for other country/other region)

.....  
.....

*Exclusion if the answer is no: the questionnaire stops here.*

"In which country were you born?" Drop-down menu opens if the woman was not born in France :

.....  
.....

If not born in France:

"In what year did you arrive in France? .....

"What was your main reason for coming to France?"

Seek a better life  / Find a job  / Join my husband  / Join another member of my family  / Threats in my country  / Studies  / Medical reasons  / Other  (opens a free text box)  
.....

"What is your current administrative situation?"

No papers at all  / Short-term residence permit  / Receipt of application for residence permit  - <1 year residence permit  1-9 years residence permit+  / Resident card (10 years)  / French nationality  / European Union legal residency  / Other  (opens a free text box)

"Do you have health insurance coverage? Or: What do you currently have to cover your health expenses?"

Standard complete Health Insurance  / Basic Health insurance  / 100% coverage for long term illness  / Complete Universal Health Insurance coverage or grant for complete health insurance  / State Medical Assistance  / No coverage  / Foreign insurance  / European Health Insurance

What is your occupation? (Free text)

|                |
|----------------|
| .....<br>..... |
|----------------|

What is your current work situation? (before pregnancy)

Unemployed  / Parental leave  / Non-contracted job  / Precarious short contract or non chosen part-time work, intermittence, self-employed without any replacement income during maternity leave  / Non-precarious short term contract  / Non-precarious long term contract or self-employment with substitute income allowing maternity leave  / Student or on training

"Currently, how are you housed?" :

- In a personal housing (you are at home, renting or owning)
- Hosted by family, acquaintances
- Hosted in residence for asylum seekers or in migrant hostel
- Hosted by associations
- No housing or overnight stay in social hostel

"What is the household's main source of income?"

My partner  / Me  / Balanced revenues  / No income apart from possible welfare benefits

Until what age were you a pupil or student?" :

Never  / Primary or Koranic school  / Secondary school  / Higher education

"How long have you been with your partner?":

<1 year  / 1-3 years  / 4-10 years  / > 10 years  / we're not really together

"Are you married?"

*Keep in mind the possibility of polygamy, so you don't mistakenly check "monogamous" if the answer is "yes" and there may be another spouse.*

No  / Yes monogamous (any form of formal union: traditional, civil, religious or civil solidarity pact)

Yes polygamous spouse or partner's concurrent household

*The interviewer now adapts his or her wording: "spouse" or "husband" or "future father".*

"Do you have any other children?"

- Yes, with the same father -> how much ...../                      Yes, with another father -> how much ...../
- No

*If the woman was born abroad:*

Number of children living in France ...../                      Number of children living in an other country ...../

In which country was your partner born? (*Drop-down menu*) ..... / *Unknown*

"How old is he?" .....

If born abroad :

"In what year did he arrive in France?" ...../                      *Unknown*

"What is his current situation with regard to the residence permit?"

No papers at all  / Short-term residence permit  / Receipt of application for residence permit  - <1 year residence permit  1-9 years residence permit+  / Resident card (10 years)  / French nationality  / European Union legal residency  / Other  (opens a free text box)

Does your partner speak French?    Not at all     A little     Fluently

Can he read it?            Yes             No             A little

Can he write it?            Yes             No             A little

*Indicate the language in which communication with the father is possible:*  
.....

Father's level of education :

DK  / Never  / Primary or Koranic school  /                      Secondary  / Higher education

Father's occupation (practiced or not): .....

Father's activity :

Precarious short contract or non chosen part-time work, intermittence, self-employed without any replacement income during maternity leave  /

Non-precarious short term contract  /

Non-precarious long term contract or self-employment with substitute income allowing maternity leave  /

Student or on training

Father's health insurance coverage:

Standard complete Health Insurance  / Basic Health insurance  / 100% coverage for long term illness  / Complete Universal Health Insurance coverage or grant for complete health insurance  / State Medical Assistance  / No coverage  / Foreign insurance  / European Health Insurance

Do you know if your partner ever sees a doctor?

Very rarely or never

Regularly as part of chronic disease management

Not often but I know he has a GP

I don't know

*Back to the woman:*

"Have you had a HIV test during your current pregnancy?"

Yes  No  I don't know

"Did you have a HIV test BEFORE this pregnancy?"

Yes  / No  I don't know

-> If yes, open the question: Reason for last screening prior to this pregnancy :

Previous pregnancy

Following the suggestion of a caregiver outside pregnancy monitoring

On suggestion but not from a caregiver (TROD offer, self-test distribution)

On my own initiative or at my partner's request outside of pregnancy

Result of last test (including current pregnancy) : VIH+  / VIH-  / Unknown

If positive : opens the question: Do you have a follow-up? YES  / NO

**If the answer is no: the interviewer informs PI**

"Have you communicated the result of the last test to your partner?"

YES  / NO

"Have you ever talked about HIV and other transmissible infections with your partner?"

YES  / NO  I do not remember

"Do you know if your partner has ever had an HIV test?"

- He took a test and told me his negative result
- He took a test and told me his positive result
- He took a test but didn't tell me the result
- No, I don't think he's done any testing, but we've talked about testing before
- No and/or we never talked about it

Do you think your partner will come to this father prenatal consultation? YES  / NO

If not: why not?

- He is too busy / the hours don't suit him   
(If so: what times would have suited you?) .....
- He has already had a consultation with his GP during this pregnancy
- He won't see the point; he is healthy
- I don't want him to
- He is afraid of blood sampling
- He will be afraid one of the tests will be positive/to be diagnosed with a disease
- He is afraid of hospitals
- He doesn't trust medical secrecy or he will be afraid of being seen
- He is already being monitored for a chronic infection/disease (HIV, hepatitis, diabetes, sickle cell anemia, other...) or a non-chronic one
- Prenatal care concerns women / he won't feel concerned
- I don't want to answer
- Other reason:

What do you think of this consultation dedicated to future fathers? (Free text)

.....

.....

.....

.....

.....

.....

What do you suggest to make it acceptable and accessible to men? (Free text)

|       |
|-------|
| ..... |
| ..... |
| ..... |
| ..... |
| ..... |
| ..... |

These consultations are free, confidential and can take place at the hospital (maternity ward or CEGIDD) or in downtown Montreuil, just a short walk from the metro. Evening consultations can also be arranged.

You can let the father know that he will be contacted, by e-mail or telephone, and that he will be offered an appointment adapted to his professional and personal constraints.

All future fathers are contacted, when their partners agree. The caregiver receiving the father will have no information about you or your file, and no contact with the team monitoring your pregnancy. No information will be given about you to him, and about him to you.
